# Supplementary material
Source: PubMed Central journal article supplement (PMC3448561)
Supplement: supp_blood-2012-04-422253_Document1.pdf [file supp_blood-2012-04-422253_Document1.pdf]

## Supplemental Data

*Informed Consent.* This study was approved by the Institutional Review Board of the Yale University School of Medicine.

*Sanger Sequencing.* The exon–intron boundaries of the *FAM38A* gene were determined using the University of California, Santa Cruz (UCSC) Genome Browser (<http://genome.ucsc.edu>). Exon-flanking primer pairs flanking exons of interest were designed with Primer 3 software (<http://primer3.sourceforge.net/webif.php>)(Table 1). These coding exons and flanking DNA were amplified from patient genomic DNA by polymerase chain reaction (PCR). PCR amplicons were subjected to capillary-based nucleotide sequence analysis.

*Discovery Proteomics. Materials.* Urea, Tris-HCl, CaCl<sub>2</sub>, iodoacetamide (IAA) were from Sigma-Aldrich (St. Louis, MO). Chloroform and Dithiothreitol (DTT) were from American Bioanalytical (Natick, MA). Methanol, acetonitrile (ACN), trifluoroacetic acid (TFA), formic acid (FA) and HPLC grade water were obtained from Burdick and Jackson (Morristown, NH). Sequencing grade modified trypsin was from Promega (Madison, WI). UltraMicroSpin columns (C<sub>18</sub>) were from The Nest Group Inc. (Southborough, MA).

Supplemental Figure S1. Identification of *FAM38A* mRNA in human erythroid cell RNA.

mRNA was prepared from cultured, primary human erythroid progenitor cells, cDNA prepared by reverse transcription, then amplified with primers tiled across the *FAM38A* locus to amplify four cDNA fragments. The initial PCR reaction utilized the outside, flanking primers, with the second PCR reaction utilizing the internal primers. The four *FAM38A* cDNA fragments were analyzed by agarose gel electrophoresis on ethidium stained gels. These fragments were subcloned and sequenced. The overlapping cDNA fragments corresponded to the human full length *FAM38A* cDNA (GI:257196141). A. Location of primers in the *FAM38A* cDNA. The sequences of these primers are provided in Supplemental Table S1. B. The *FAM38A* cDNA fragments amplified by RT-PCR from human erythroid cell mRNA.

**Supplemental Figure S1A.**

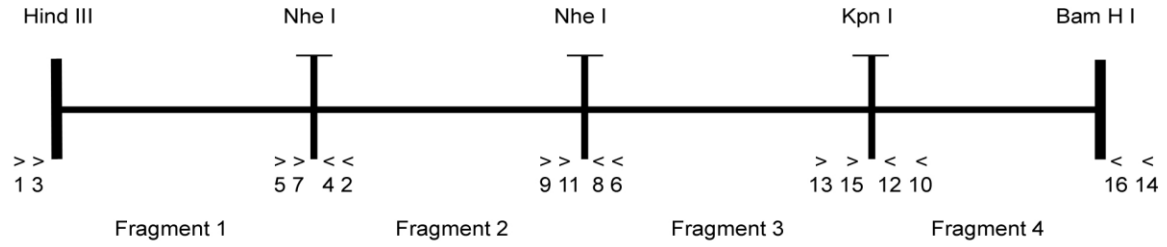

**Supplemental Figure S1B.**

### FAM38A cDNA Fragments

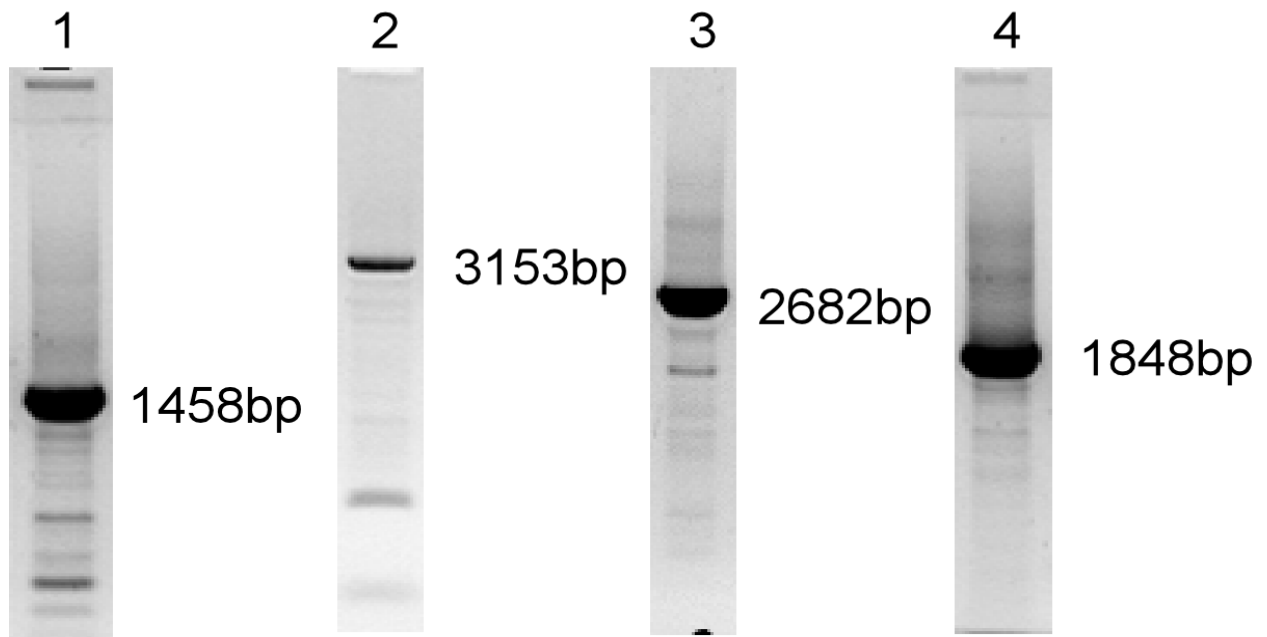

Supplemental Figure S2. Amino acid sequence of human PIEZO1 and location of peptides identified in human erythrocyte membrane ghosts by mass spectrometry. The location of peptides identified in wild type erythrocyte membrane ghosts are shown in red.

1 MEPHVLGAVL YWLLLPALL AACLLRFSGL SLVYLLFLLL LPWFPGPTRC  
 51 GLQGHTGRLL RALLGLSLLF LVAHLALQIC LHIVPRLDQL LGPSCSRWET  
 101 LSRHIGVTRL DLKDIPNAIR LVAPDLGILV VSSVCLGICG RLARNTRQSP  
 151 HPRELDDDER DVDAIPTAGL QEAATLAPTR RSRLAARFRV TAHWLLVAAG  
 201 RVLAVTLLAL AGIAHPSALS SVYLLFLAL CTWWACHFPI STRGFSRLCV  
 251 AVGCFGAGHL ICLYCYQMPL AQALLPPAGI WARVLGLKDF VGPTNCSSPH  
 301 ALVLNTGLDW PVYASPGVLL LLCYATASLR KLRAYRPSGQ RKEAAKGYEA  
 351 RELELAELDQ WPQERESDQH VVPTAPDTEA DNCIVHELTG QSSVLRPVR  
 401 PKRAEPREAS PLHSLGHLIM DQSYVCALIA MMVWSITYHS WLTFVLLLWA  
 451 CLIWTVRSRH QLAMLCSPCI LLYGMTLCCL RYVWAMDLRP ELPTTLGPVS  
 501 LRQLGLEHTR YPCLDLGAML LYTLTFWLLL RQFVKEKLLK WAESPAALTE  
 551 VTVADTEPTR TQTLQSLGE LVKGVYAKYW IYVCAGMFIV VSFAGRLVVY  
 601 KIVYMFLFLL CLTLFQVYYS LWRKLLKAFW WLVVAYTMLV LIAVYTFQFQ  
 651 DFPAYWRNLT GFTDEQLGDL GLEQFSVSEL FSSILVPGFF LLACILQLHY  
 701 FHRPFMQLTD MEHVSLPGTR LPRWAHRQDA VSGTPLLREE QQEHQQQQQE  
 751 EEEEEEDSRD EGLGVATPHQ ATQVPEGAAK WGLVAERLLE LAAGFSDVLS  
 801 RVQVFLRRL ELHVFKLVAL YTVWVALKEV SVMNLLLVVL WAFALPYPRF  
 851 RPMASCLSTV WTCVIVCKM LYQLKVVNPQ EYSSNCTEPF PNSTNLLPTE  
 901 ISQSLLYRGP VDPANWFGVR KGFPNLGYIQ NHLQVLLLLV FEAIYVRRQE  
 951 HYRRQHQLAP LPAQAVFASG TRQQLDQDLL GCLKYFINFF FYKFGLEICF  
 1001 LMAVNVIGQR MNFLVTLHGC WLVAILTRRH RQAIARLWPN YCLFLALFLL  
 1051 YQYLLVCLGMP PALCIDYPWR WSRAVPMNSA LIKWLYLPDF FRAPNSTNLI  
 1101 SDFLLLLCAS QQWQVFAER TEEWQRMAGV NTDRLLEPLRG EPNPVPNFIH  
 1151 CRSYLDMLKV AVFRYLFWL VLVVFTGAT RISIFGLGYL LACFYLLLF  
 1201 TALLQRDTRA RLVLWDCLIL YNVTVIISK MSLLLACVFV EQMQTGFCWV  
 1251 IQLFSLVCTV KGYYPKEMM DRDQDCLLPV EEAGIWDVSV CFFFLLLQRR  
 1301 VFLSHYYLHV RADLQATALL ASRGFALYNA ANLKSIDFHR RIEEKSLAQL  
 1351 KRQMERIRAK QEKHRQGRVD RSRPQDTLGP KDPGLEPGPD SPGGSSPPRR  
 1401 QWWRPWL DHA TVIHSGDYFL FESDSEEEEE AVPEDPRPSA QSAFQLAYQA  
 1451 WVTNAQAVLR RRQEQEQAR QEQAGQLPTG GGPSQEV EPA EGPEEAAAGR  
 1501 SHVVQRVLST AQFLWMLGQA LVDELTRWLQ EFTRHHGTMS DVLRAERYLL  
 1551 TQELLQGGEV HRGVLDQLYT SQAEATLPGP TEAPNAPSTV SSSLGAE EPL  
 1601 SSMTDDMGSP LSTGYHTRSG SEEAVTDPGE REAGASLYQG LMRTASELLL  
 1651 DRRLRIPELE EAELFAEGQG RALRLLRAVY QCVAHSELL CYFIIILNHM  
 1701 VTASAGSLVL PVLVFLWAML SIPRPSKRFW MTAIVFTEIA VVKYLFQFG  
 1751 FFPWNHVVVL RRYENKPYFP PRILGLEKTD GYIKYDLVQL MALFFHRSQL  
 1801 LCYGLWDHEE DSPSKEHDKS GEEEQGAE EG PGVPAATTED HIQVEARVGP  
 1851 TDGTPEPQVE LRPRDTRRIS LRFRRRKEG PARKGAAAIE AEDREEEEGE  
 1901 EEKEAPTGRE KRPSRSGGRV RAAGRRLQGF CLSLAQGTYR PLRRFFHDIL  
 1951 HTKYRAATDV YALMFLADV DFIIIFGFV AFGKHAATD ITSSLSDDQV  
 2001 PEAFVLMLLI QFSTMVVDRA LYLRKTVL GK LAFQVALVLA IHLWMFFILP  
 2051 AVTERMFNQN VVAQLWYFVK CIYFALSAYQ IRCGYPTRIL GNFLTCKYNH  
 2101 LNLFLFQGF R LVPFLVELRA VMDWVWTDTT LSLSSWMCVE DIYANIFI I K  
 2151 CSRETEKKYP QPKGQKKKKI VKYGMGLII LFLIAIIWFP LLFMSLVR SV  
 2201 VGVVNQPIDV TVTLKLG GYE PLFTMSAQQP SIIPFTAQAY EELSRQFDPQ  
 2251 PLAMQFISQY SPEDIVTAQI EGSSGALWRI SPPSRAQMKR ELYNGTADIT  
 2301 LRFTWNFQ RD LAKGGTVEYA NEKHMLALAP NSTARRQLAS LLEGTS DQSV  
 2351 VIPNLF PKYI RAPNGPEANP VKQLQPN EEA DYLGVRIQLR REQGAGATGF  
 2401 LEWVVI ELQE CRTDCNLLPM VIFSDKVSP SLGFLAGYGI MGLYVSIVLV  
 2451 IGKFVRGFFS EISHSIMFEE LPCVDRI LKL CQDIFLVRET RELELEEEELY  
 2501 AKLIFLYRSP ETMIKWTR EK

## Supplemental Tables

Supplemental Table S1. *Primers for amplification across the FAM38A cDNA.*

|           |                                |                  |
|-----------|--------------------------------|------------------|
| Primer 1  | TATAAAGCTTCCGAAGGAGAAGGAGGAAGA | Hind III linker. |
| Primer 2  | TATAGGATCCGCTCTGGTCCATGATGAGGT | Bam HI linker.   |
| Primer 3  | TATAAAGCTTCCAGCCATGGAGCCGCACGT | Hind III linker  |
| Primer 4  | TATAGGATCCGCAGTTATCAGCCTCGGTGT | Bam HI linker    |
| Primer 5  | TATAAAGCTTCTAGGGTGTGGGTCTCAAG  | Hind III linker. |
| Primer 6  | TATAGGATCCTAGCTGTCCTGCCTGTTCT  | Bam HI linker.   |
| Primer 7  | TATAAAGCTTCTGGACTGGCCTGTGTATGC | Hind III linker  |
| Primer 8  | TATAGGATCCACGGATACGCTCCATCTGTC | Bam HI linker    |
| Primer 9  | TATAAAGCTTGTGGGACTGCCTCATTCTGT | Hind III linker. |
| Primer 10 | TATAGGATCCCTGGAAGAGGAAGAGGTT   | Bam HI linker.   |
| Primer 11 | TATAAAGCTTAAGAACATGCTGTCGCTCCT | Hind III linker  |
| Primer 12 | TATAGGATCCACAGGGCGAAGTAGATGCAC | Bam HI linker    |
| Primer 13 | TATAAAGCTTCATGTTCTGGCTGATGTTG  | Hind III linker. |
| Primer 14 | TATAGGATCCGCAGTGTCTTCTCTGACA   | Bam HI linker.   |
| Primer 15 | TATAAAGCTTACGTCTCCCTATCAGACGA  | Hind III linker  |
| Primer 16 | TATAGGATCCTCTCTGACAGCAGCATCAGG | Bam HI linker    |

Supplemental Table S2. *Primers flanking exons 46 and 51 of the human FAM38A gene.*

|         |                                        |
|---------|----------------------------------------|
| Exon 46 | tgtaaaacgacggccagtGCCAGCTGGGTACAAGTGAC |
| Exon 46 | caggaaacagctatgaccAGAATGCGGTTGTGTGACC  |
| Exon 51 | tgtaaaacgacggccagTGCCCATGGTCATTTTCAGT  |
| Exon 51 | caggaaacagctatgacCGGGAGGATGCATCACAG    |

Supplemental Table S3. Coverage across the *FAM 38A* locus in patient exome samples.

| Sample:              | HA-006        | HA-032        | HA-128         | HA-135         | HA-136         | M1-24         | M1-38         | M1-39         | M1-40         |              |
|----------------------|---------------|---------------|----------------|----------------|----------------|---------------|---------------|---------------|---------------|--------------|
| Source Location:     | Manitoba      | Manitoba      | Manitoba       | Manitoba       | Manitoba       | New York      | New York      | New York      | New York      |              |
| Xerocytosis:         | +             | +             | +              | -              | -              | +             | +             | +             | +             |              |
| Total Reads          | 207,969,448   | 182,763,722   | 221,020,790    | 198,350,788    | 190,200,202    | 76,573,978    | 74,589,346    | 68,595,106    | 75,324,274    |              |
| Non duplicated Reads | 143,326,370   | 137,773,325   | 170,214,149    | 155,290,377    | 152,454,208    | 72,721,380    | 68,878,929    | 64,516,906    | 70,917,040    |              |
| Mapped Reads         | 133,994,834   | 129,220,739   | 159,566,254    | 145,781,211    | 142,780,790    | 67,444,842    | 64,455,562    | 59,940,234    | 65,954,551    |              |
| Mapped Bases         | 9,889,997,216 | 9,544,514,665 | 11,779,921,597 | 10,765,779,161 | 10,545,271,824 | 4,977,902,513 | 4,755,045,595 | 4,421,276,255 | 4,863,508,180 |              |
| On Target Bases      | 4,511,414,200 | 4,895,080,184 | 4,414,613,257  | 3,937,459,838  | 3,979,840,555  | 1,940,838,879 | 1,863,597,226 | 2,310,563,920 | 1,983,913,273 |              |
| Mean Base Coverage   | 126.904164    | 137.255354    | 169.305243     | 151.077232     | 152.665215     | 74.66408      | 71.760007     | 64.893513     | 76.396277     |              |
| No Coverage Bases    | 1.7%          | 1.4%          | 1.4%           | 1.4%           | 1.4%           | 1.7%          | 1.8%          | 1.6%          | 1.7%          |              |
| >= 2 Coverage Bases  | 96.5%         | 97.2%         | 97.4%          | 97.5%          | 97.6%          | 96.9%         | 96.8%         | 96.7%         | 96.8%         |              |
| >= 10 Coverage Bases | 92.9%         | 94.8%         | 94.7%          | 95.3%          | 95.3%          | 92.6%         | 92.9%         | 92.1%         | 93.0%         |              |
| >= 20 Coverage Bases | 89.0%         | 92.0%         | 92.1%          | 92.9%          | 93.0%          | 86.2%         | 87.0%         | 84.9%         | 87.2%         | <b>87.3%</b> |
